# Supplementary material
Source: PubMed Central journal article supplement (PMC122590)
Supplement: pnas_042700699_2.pdf [file pnas_042700699_2.pdf]

**a**

| SNP Position | nucl. change | a.a. change | PR00H2*757  | PR00H2*758 | PR00H2*1195 | PR00H2*1482 | PR00H2*1496 | PR00H2*1766 | PR00H2*1945 | PR00H2*2026 | Minor allele | %   |
|--------------|--------------|-------------|-------------|------------|-------------|-------------|-------------|-------------|-------------|-------------|--------------|-----|
| Exon 4       | C->T         | Arg185Trp   | PR00H2*757  |            |             |             |             |             |             |             | T=a1         | 37% |
| Exon 4       | G->A         | Arg185Gln   | PR00H2*758  |            |             |             |             |             |             |             | A=a2         | 5%  |
| Exon 8       | C->T         | Leu331Leu   | PR00H2*1195 |            |             |             |             |             |             |             | T=a1         | 36% |
| Exon 11      | C->T         | Asp426Asp   | PR00H2*1482 |            |             |             |             |             |             |             | T=a2         | 13% |
| Exon 11      | G->A         | Arg431His   | PR00H2*1496 |            |             |             |             |             |             |             | A=a1         | 11% |
| Exon 13      | A->G         | Gln521Arg   | PR00H2*1766 |            |             |             |             |             |             |             | G=a1         | 5%  |
| Exon 14      | T->C         | Leu581Leu   | PR00H2*1945 |            |             |             |             |             |             |             | C=a2         | 17% |
| 3'UTR        | C->T         | N/A         | PR00H2*2026 |            |             |             |             |             |             |             | T=a2         | 4%  |

**b**

**Haplotype transmission**

| AS+COS |    | AS(ChS)+COS |    |   |   |   |   |   |   |   |   |  |  |  |       |
|--------|----|-------------|----|---|---|---|---|---|---|---|---|--|--|--|-------|
| T      | nT | T           | nT |   |   |   |   |   |   |   |   |  |  |  |       |
| 55     | 63 | 30          | 42 | 2 | 1 | 2 | 1 | 2 | 2 | 1 | 1 |  |  |  | 30.0% |
| 53     | 50 | 38          | 32 | 1 | 1 | 1 | 1 | 2 | 2 | 1 | 1 |  |  |  | 27.5% |
| 26     | 9  | 18          | 2  | 2 | 1 | 2 | 2 | 2 | 2 | 2 | 1 |  |  |  | 10.5% |
| 12     | 14 | 8           | 11 | 2 | 1 | 2 | 1 | 1 | 2 | 1 | 1 |  |  |  | 8.2%  |
| 5      | 9  | 4           | 7  | 2 | 2 | 2 | 1 | 2 | 2 | 1 | 1 |  |  |  | 4.0%  |
| 6      | 1  | 4           | 1  | 1 | 1 | 2 | 1 | 2 | 2 | 1 | 1 |  |  |  | 3.5%  |
| 7      | 7  | 5           | 6  | 2 | 1 | 1 | 1 | 2 | 2 | 1 | 1 |  |  |  | 3.3%  |
| 3      | 4  | 3           | 3  | 2 | 1 | 2 | 1 | 2 | 1 | 2 | 2 |  |  |  | 1.9%  |
| 3      | 4  | 1           | 2  | 1 | 1 | 1 | 1 | 2 | 1 | 2 | 2 |  |  |  | 1.4%  |
|        |    |             |    | 2 | 1 | 1 | 1 | 1 | 2 | 1 | 1 |  |  |  | 1.2%  |
|        |    |             |    | 2 | 1 | 2 | 2 | 2 | 2 | 1 | 1 |  |  |  | 0.9%  |
|        |    |             |    | 1 | 1 | 2 | 2 | 2 | 2 | 1 | 1 |  |  |  | 0.9%  |
| 11     | 19 | 7           | 12 | 2 | 1 | 2 | 1 | 2 | 2 | 2 | 1 |  |  |  | 0.7%  |
|        |    |             |    | 1 | 1 | 2 | 1 | 1 | 2 | 1 | 1 |  |  |  | 0.6%  |
|        |    |             |    | 1 | 1 | 1 | 1 | 2 | 1 | 2 | 1 |  |  |  | 0.2%  |
|        |    |             |    | 2 | 2 | 2 | 1 | 2 | 2 | 2 | 1 |  |  |  | 0.2%  |
|        |    |             |    | 1 | 1 | 1 | 2 | 2 | 2 | 1 | 1 |  |  |  | 0.2%  |
